# Supplementary material for: Seasonal forecasting of local-scale soil moisture droughts with Global BROOK90
Source: Copernicus journal article supplement (doi:10.5194/nhess-2023-9), 2023-02-17
Supplement: Supplementary file [file nhess-2023-9-AC1-supplement.pdf]

## Response to Reviewer 1

| Comment                                                                                                                                                  | Answer, changes                                                                                                                                                                                                                                    |
|----------------------------------------------------------------------------------------------------------------------------------------------------------|----------------------------------------------------------------------------------------------------------------------------------------------------------------------------------------------------------------------------------------------------|
| The manuscript in its current state needs to be re-written.                                                                                              | Agreed, the text was proof-read and corrected (including the comments mentioned below)                                                                                                                                                             |
| Expand any new abbreviation once for example, SPI in line 55 is not expanded earlier in the text, (I am guessing it is standardized precipitation index) | Agreed, corrected.                                                                                                                                                                                                                                 |
| line 146: "As the framework aims to reach/cater-to local scale and professional and non-professional users"                                              | Agreed, rephrased.                                                                                                                                                                                                                                 |
| line 148: "test case"                                                                                                                                    | Agreed, corrected.                                                                                                                                                                                                                                 |
| line 156: "above mentioned" and "yield 1.5 minutes"                                                                                                      | Agreed, corrected.                                                                                                                                                                                                                                 |
| Also, I have usually seen medium-range forecast associated to 3 to10 days forecast but the study goes out to months of forecast.                         | Agreed, we corrected according to the (WMO 2021) definition of seasonal forecast (Chapter 2.1 Definitions). Thus to avoid terminology confusion, terms of 'long' and 'medium' with respect to lead time in abstract and conclusion were rephrased. |

## References:

World Meteorological Organization (WMO), Guidelines on Seasonal Hydrological Prediction, 2021, Geneva, ISBN 978-92-63-11274-3
